# Supplementary material for: The Cumulative Effect of Gene-Gene and Gene-Environment Interactions on the Risk of Prostate Cancer in Chinese Men
Source: PubMed Central journal article supplement (PMC4772182; doi:10.3390/ijerph13020162), 2016-01-27

# Supplementary Materials: The Cumulative Effect of Gene-Gene and Gene-Environment Interactions on the Risk of Prostate Cancer in Chinese Men

Ming Liu, Xiaohong Shi, Fan Yang, Jianye Wang, Yong Xu, Dong Wei, Kuo Yang, Yaoguang Zhang, Xin Wang, Siying Liang, Xin Chen, Liang Sun, Xiaoquan Zhu, Chengxiao Zhao, Ling Zhu, Lei Tang, Chenguang Zheng and Ze Yang

**Table S1.** PCR primers of 36 SNPs and annealing temperature for HRM.

| SNPs        | Primer (5'-3')                     | Annealing Temperature |
|-------------|------------------------------------|-----------------------|
| rs2710646F  | 5'-TTTAGGGGGACACAAGCA-3'           | 59 °C                 |
| rs2710646R  | 5'-GGACAGACAGATATCAAATACACTC-3'    |                       |
| rs721048F   | 5'-CCTGAGGATTATCAAGGTCCC-3'        | 63 °C                 |
| rs721048R   | 5'-GGCTCCTGTTCCACACTG-3'           |                       |
| rs1465618F  | 5'-TCTGGTAGAGCTTGGTAAGTCC-3'       | 59 °C                 |
| rs1465618R  | 5'-ATATTGTGAAGCCTTGGTG-3'          |                       |
| rs12621278F | 5'-TTCCTTGCTGCAGTAGACAGTGTT-3'     | 59 °C                 |
| rs12621278R | 5'-CCAAGCAATTCATAACCACTAAGACATC-3' |                       |
| rs2660753F  | 5'-AGGTACAGCAAGGGCAAACAA-3'        | 63 °C                 |
| rs2660753R  | 5'-GGGTTCCAATTGAGGGTCTAT-3'        |                       |
| rs10934853F | 5'-TTGGCCTGTGTGTTACA-3'            | 56 °C                 |
| rs10934853R | 5'-GGCATACGCTTTGTG-3'              |                       |
| rs17021918F | 5'-GCTGCTATTTTTCCTT-3'             | 50 °C                 |
| rs17021918R | 5'-TTACTAAGCAGGTGCTC-3'            |                       |
| rs7679673F  | 5'-GCCAAGATTATAGGAA-3'             | 50 °C                 |
| rs7679673R  | 5'-TCATGGGAAAATTCTAC-3'            |                       |
| rs9364554F  | 5'-CCACTATGATTAGTCCATCCTTGTC-3'    | 63 °C                 |
| rs9364554R  | 5'-ACAGCTCAAATGTGTTCACTC-3'        |                       |
| rs6465657F  | 5'-TCTGGTACGTATTGGCTTA-3'          | 50 °C                 |
| rs6465657R  | 5'-CTCAAAGAGGAAGAAGTTAGG-3'        |                       |
| rs1512268F  | 5'-CCCAATGCAGATTGAGTTA-3'          | 56 °C                 |
| rs1512268R  | 5'-GAAGCAAACCCTTTCTGTAGA-3'        |                       |
| rs12543663F | 5'-GCCACCTCAATATGAATA-3'           | 54 °C                 |
| rs12543663R | 5'-CCATCAGCTTTTGTAGTTTC-3'         |                       |
| rs10086908F | 5'-GATGAAATGAAACCAGTG-3'           | 51 °C                 |
| rs10086908R | 5'-CTTCTATCACCTCAAACCTT-3'         |                       |
| rs1016343F  | 5'-CCAAGACCATGTGTTACA-3'           | 56 °C                 |
| rs1016343R  | 5'-GAACTGTGAAGCTGTGAGT-3'          |                       |
| rs13252298F | 5'-CTTGCTGTCTTCTCAGATA-3'          | 54 °C                 |
| rs13252298R | 5'-CACACTTGCCATTTAG-3'             |                       |
| rs6983561F  | 5'-AGGAGAATTGCAAACCT-3'            | 54 °C                 |
| rs6983561R  | 5'-CCTTGATATGCAATTAGC-3'           |                       |
| rs16901966F | 5'-GGAAAACAGATGTCACAA-3'           | 54 °C                 |
| rs16901966R | 5'-GAGGAAATGCTGGAAAAT-3'           |                       |
| rs16902094F | 5'-TAGATACAGGCCACCTTT-3'           | 54 °C                 |
| rs16902094R | 5'-CCACAATAACCCAAATG-3'            |                       |
| rs445114F   | 5'-CAAGCAGTGATCCGTTT-3'            | 50 °C                 |
| rs445114R   | 5'-GCAAGTAAGTGCTAAAATAAAGGTA-3'    |                       |
| rs620861F   | 5'-TTGTAGTTGAATGCCTGTG-3'          | 50 °C                 |
| rs620861R   | 5'-AGCCCCTAAAATGGTAGATAC-3'        |                       |

Table S1. Cont.

| SNPs        | Primer (5'-3')                  | Annealing Temperature |
|-------------|---------------------------------|-----------------------|
| rs6983267F  | 5'-AGAGTTAATACCCTCATCGT-3'      | 50 °C                 |
| rs6983267R  | 5'-TTCCTTGTACTTTTCTCAGT-3'      |                       |
| rs1447295F  | 5'-GCCATTGGGGAGGTATGT-3'        | 56 °C                 |
| rs1447295R  | 5'-GGGGTTCCTGTTGCTTT-3'         |                       |
| rs10090154F | 5'-CAGCTTTAATGCAATTCT-3'        | 50 °C                 |
| rs10090154R | 5'-TCCAATATTGTTTTAGC-3'         |                       |
| rs7837688F  | 5'-CCAACATTTCCCACTAGAG-3'       | 54 °C                 |
| rs7837688R  | 5'-GACGTGTCAACATAGACC-3'        |                       |
| rs10993994F | 5'-CTCAATGTGTTCTCACCTTGTATC-3'  | 64 °C                 |
| rs10993994R | 5'-TTTATACTGGAGAGGGCAACC-3'     |                       |
| rs4962416F  | 5'-TGGAAGTTTCTGACACCG-3'        | 59 °C                 |
| rs4962416R  | 5'-AGGAACAGGGAGTGACTCA-3'       |                       |
| rs7127900F  | 5'-GGCCATGCGAGGAATGAT-3'        | 64 °C                 |
| rs7127900R  | 5'-GTGAGGCCTGTCCATGCT-3'        |                       |
| rs7931342F  | 5'-ACAGGATCAGGGAAAGTTGC-3'      | 59 °C                 |
| rs7931342R  | 5'-GCCCATCCTTCCACATTC-3'        |                       |
| rs4430796F  | 5'-AGAGAGGCAGCACAGACT-3'        | 64 °C                 |
| rs4430796R  | 5'-GCCCTGCCCAATTTAAG-3'         |                       |
| rs1859962F  | 5'-AGACTTTTCCAAATCCCTG-3'       | 54 °C                 |
| rs1859962R  | 5'-GCCCATATTAGAAATCTTG-3'       |                       |
| rs2735839F  | 5'-CGCCTAGGGATCTGGTT-3'         | 56 °C                 |
| rs2735839R  | 5'-CCTCCTTCTTGGGATAGC-3'        |                       |
| rs13385191F | 5'-GCTGAGGTCCCTATGTC-3'         | 56 °C                 |
| rs13385191R | 5'-CTCCAATCCTTCTTCTCG-3'        |                       |
| rs12653946F | 5'-CCACACAAATGTGCTTATG-3'       | 56 °C                 |
| rs12653946R | 5'-CTTGCTTGTGATGAACAGA-3'       |                       |
| rs1983891F  | 5'-GGTCCCATTCTCCTCGTA-3'        | 54 °C                 |
| rs1983891R  | 5'-ACAAGGACCAACAGACAG-3'        |                       |
| rs339331F   | 5'-CACTTTGCATGAACTCTC-3'        | 51 °C                 |
| rs339331R   | 5'-CCTCCTAGTCACTAAAGATAAACCT-3' |                       |
| rs9600079F  | 5'-TTGCACCCACTTACAAT-3'         | 54 °C                 |
| rs9600079R  | 5'-TTGGTCTCAATTTTACAG-3'        |                       |

F: Forward primer; R: Reverse primer; Rs11986220 was genotyped by sequencing.

Table S2. PCR primers of 37 SNPs for sequencing.

| SNPs        | Primer (5'-3')                    | Annealing Temperature |
|-------------|-----------------------------------|-----------------------|
| rs2710646F  | 5'-TTTAGGGGGACACAAGCA-3'          | 59 °C                 |
| rs2710646R  | 5'-GGACAGACAGATATCAAATACACTC-3'   |                       |
| rs721048F   | 5'-CCTGAGGATTATCAAGGTCCC-3'       | 63 °C                 |
| rs721048R   | 5'-GGCTCCTGTTCCCACTG-3'           |                       |
| rs1465618F  | 5'-TCTGGTAGAGCTTGGTAAGTCC-3'      | 59 °C                 |
| rs1465618R  | 5'-ATATTGTGAAGCCTTGGTG-3'         |                       |
| rs12621278F | 5'-TTCCTTGCTGCAGTAGACAGTGT-3'     | 59 °C                 |
| rs12621278R | 5'-CCAAGCAATTCATACCACTAAGACATC-3' |                       |
| rs2660753F  | 5'-AGGTACAGCAAGGGCAAACAA-3'       | 63 °C                 |
| rs2660753R  | 5'-GGGTTCGAATTGAGGGTCTAT-3'       |                       |

Table S2. Cont.

| SNPs        | Primer (5'-3')                  | Annealing Temperature |
|-------------|---------------------------------|-----------------------|
| rs10934853F | 5'-TTGGCCTGTGTGTTACA-3'         | 56 °C                 |
| rs10934853R | 5'-GGCATACGCTTTGTG-3'           |                       |
| rs17021918F | 5'-GCTGCTATTTTTCCTT-3'          | 50 °C                 |
| rs17021918R | 5'-TACTAAGCAGGTGCTC-3'          |                       |
| rs7679673F  | 5'-GCCAAGATTATAGGAA-3'          | 50 °C                 |
| rs7679673R  | 5'-TCATGGGAAAATTCTAC-3'         |                       |
| rs9364554F  | 5'-CCACTATGATTAGTCCATCCTTGTC-3' | 63 °C                 |
| rs9364554R  | 5'-ACAGCTCAAATGTGTTCACTC-3'     |                       |
| rs6465657F  | 5'-TCTGGTACGTATTGGCTTA-3'       | 50 °C                 |
| rs6465657R  | 5'-CTCAAAGAGGAAGAAGTTAGG-3'     |                       |
| rs1512268F  | 5'-CCCAATGCAGATTGAGTTA-3'       | 56 °C                 |
| rs1512268R  | 5'-GAAGCAAACCTTTCTGTAGA-3'      |                       |
| rs12543663F | 5'-GCCACCTCAATATGAATA-3'        | 54 °C                 |
| rs12543663R | 5'-CCATCAGCTTTTGTAGTTTC-3'      |                       |
| rs10086908F | 5'-GATGAAATGAAACCAGTG-3'        | 51 °C                 |
| rs10086908R | 5'-CTTCTATCACCTCAAACCTT-3'      |                       |
| rs1016343F  | 5'-CCAAGACCATGTGTTACA-3'        | 56 °C                 |
| rs1016343R  | 5'-GAACTGTGAAGCTGTGAGT-3'       |                       |
| rs13252298F | 5'-CTTGCTGCTTCTCAGATA-3'        | 54 °C                 |
| rs13252298R | 5'-CACACTTGCCATTTAG-3'          |                       |
| rs6983561F  | 5'-AGGAGAATTGCAAACCT-3'         | 54 °C                 |
| rs6983561R  | 5'-CCTTGATATGCAATTAGC-3'        |                       |
| rs16901966F | 5'-GGAAAACAGATGTCACAA-3'        | 54 °C                 |
| rs16901966R | 5'-GAGGAAATGCTGGAAAAT-3'        |                       |
| rs16902094F | 5'-TAGATACAGGCCACCTTT-3'        | 54 °C                 |
| rs16902094R | 5'-CCACAATAACCCAAATG-3'         |                       |
| rs445114F   | 5'-CAAGCAGTGATCCGTTT-3'         | 50 °C                 |
| rs445114R   | 5'-GCAAGTAAGTGCTAAAATAAAGGTA-3' |                       |
| rs620861F   | 5'-TTGTAGTTGAATGCCTGTG-3'       | 50 °C                 |
| rs620861R   | 5'-AGCCCCTAAAATGGTAGATAC-3'     |                       |
| rs6983267F  | 5'-AGAGTTAATACCCTCATCGT-3'      | 50 °C                 |
| rs6983267R  | 5'-TTCCTTGTACTTTTCTCAGT-3'      |                       |
| rs1447295F  | 5'-GCCATTGGGGAGGTATGT-3'        | 56 °C                 |
| rs1447295R  | 5'-GGGGTTCCTGTTGCTTT-3'         |                       |
| rs10090154F | 5'-CAGCTTTAATGCAATTCT-3'        | 50 °C                 |
| rs10090154R | 5'-TCCAATATTGTTTTAGC-3'         |                       |
| rs7837688F  | 5'-CCAACATTTCCCACTAGAG-3'       | 54 °C                 |
| rs7837688R  | 5'-GACGTGTCAACATAGACC-3'        |                       |
| rs10993994F | 5'-CTCAATGTGTTCTCACCTTGTTATC-3' | 64 °C                 |
| rs10993994R | 5'-TTTATACTGGAGAGGGCAACC-3'     |                       |
| rs4962416F  | 5'-TGGAAGTTTCCTGACACCG-3'       | 59 °C                 |
| rs4962416R  | 5'-AGGAACAGGGAGTGACTCA-3'       |                       |
| rs7127900F  | 5'-GGCCATGCGAGGAATGAT-3'        | 64 °C                 |
| rs7127900R  | 5'-GTGAGGCCCTGTCCATGCT-3'       |                       |
| rs7931342F  | 5'-ACAGGATCAGGGAAGTTGC-3'       | 59 °C                 |
| rs7931342R  | 5'-GCCATCCTTCCACATTC-3'         |                       |
| rs4430796F  | 5'-AGAGAGGCAGCACAGACT-3'        | 64 °C                 |
| rs4430796R  | 5'-GCCCTGCCCAATTTAAG-3'         |                       |

Table S2. Cont.

| SNPs        | Primer (5'-3')                  | Annealing Temperature |
|-------------|---------------------------------|-----------------------|
| rs1859962F  | 5'-AGACTTTTCCAAATCCCTG-3'       | 54 °C                 |
| rs1859962R  | 5'-GCCCCATTATTAGAAATCTTG-3'     |                       |
| rs2735839F  | 5'-CGCCTAGGGATCTGGTT-3'         | 56 °C                 |
| rs2735839R  | 5'-CCTCCTTCTTGGGATAGC-3'        |                       |
| rs13385191F | 5'-GCTGAGGTCCCTATGTC-3'         | 56 °C                 |
| rs13385191R | 5'-CTCCAATCCTTCTTCTCG-3'        |                       |
| rs12653946F | 5'-CCACACAAATGTGCTTATG-3'       | 56 °C                 |
| rs12653946R | 5'-CTTGCTTGTGATGAACAGA-3'       |                       |
| rs1983891F  | 5'-GGTCCCATTCTCCTCGTA-3'        | 54 °C                 |
| rs1983891R  | 5'-ACAAGGACCAACAGACAG-3'        |                       |
| rs339331F   | 5'-CACTTTGCATGAACTCTC-3'        | 51 °C                 |
| rs339331R   | 5'-CCTCCTAGTCACTAAAGATAAACCT-3' |                       |
| rs9600079F  | 5'-TTGCACCCACTTACAAT-3'         | 54 °C                 |
| rs9600079R  | 5'-TTGGTCTCAATTTTACAG-3'        |                       |
| rs11986220F | 5'-ACCATGTTTAACTAACCCAC-3'      | 57 °C                 |
| rs11986220R | 5'-CTTATAGCTTACGACCTTACTG-3'    |                       |

F: Forward primer; R: Reverse primer.

**Table S3.** Distribution of the risk alleles and genotypes (n/fre) of 36 SNPs in PCa cases and control subjects, and the test result for HWE.

| SNPs ID    | Our Study |                 |             |       |                   |             |             |             |             |             | Hapmap |
|------------|-----------|-----------------|-------------|-------|-------------------|-------------|-------------|-------------|-------------|-------------|--------|
|            | Alleles   | Allele1 (n/RAF) |             |       | Genotype (n/freq) |             |             |             |             |             | RAF    |
|            | (1/2)     | Case            | Control     | HWE   | Case              |             |             | Control     |             |             |        |
|            |           | 1               | 1           | (p)   | 11                | 12          | 22          | 11          | 12          | 22          |        |
| rs721048   | A/G       | 20 (0.038)      | 12 (0.024)  | 0.697 | 2 (0.008)         | 16 (0.061)  | 244 (0.931) | 0 (0.000)   | 12 (0.048)  | 237 (0.952) | 0.020  |
| rs2710646  | A/C       | 24 (0.042)      | 20 (0.035)  | 0.000 | 3 (0.010)         | 18 (0.062)  | 268 (0.927) | 3 (0.010)   | 14 (0.049)  | 269 (0.941) | 0.020  |
| rs1465618  | A/G       | 391 (0.694)     | 350 (0.646) | 0.505 | 138 (0.496)       | 110 (0.396) | 30 (0.108)  | 118 (0.445) | 114 (0.430) | 33 (0.125)  | 0.670  |
| rs12621278 | A/G       | 406 (0.720)     | 411 (0.719) | 0.920 | 148 (0.525)       | 110 (0.390) | 24 (0.085)  | 148 (0.517) | 115 (0.402) | 23 (0.080)  | 0.760  |
| rs13385191 | G/A       | 272 (0.472)     | 255 (0.444) | 0.384 | 68 (0.236)        | 136 (0.472) | 84 (0.292)  | 53 (0.185)  | 149 (0.519) | 85 (0.296)  | 0.430  |
| rs2660753  | A/G       | 186 (0.338)     | 171 (0.330) | 0.828 | 34 (0.124)        | 118 (0.429) | 123 (0.447) | 29 (0.112)  | 113 (0.436) | 117 (0.452) | 0.360  |
| rs10934853 | A/C       | 243 (0.423)     | 247 (0.432) | 0.937 | 54 (0.188)        | 135 (0.470) | 98 (0.341)  | 53 (0.185)  | 141 (0.493) | 92 (0.322)  | 0.420  |
| rs17021918 | C/T       | 373 (0.650)     | 379 (0.667) | 0.138 | 119 (0.415)       | 135 (0.470) | 33 (0.115)  | 132 (0.465) | 115 (0.405) | 37 (0.130)  | 0.680  |
| rs7679673  | C/A       | 124 (0.225)     | 117 (0.210) | 0.413 | 19 (0.069)        | 86 (0.313)  | 170 (0.618) | 10 (0.036)  | 97 (0.348)  | 172 (0.616) | 0.160  |
| rs12653946 | T/C       | 249 (0.431)     | 229 (0.398) | 0.386 | 58 (0.201)        | 133 (0.460) | 98 (0.339)  | 42 (0.146)  | 145 (0.503) | 101 (0.351) | 0.330  |
| rs9364554  | T/C       | 178 (0.327)     | 181 (0.342) | 0.180 | 31 (0.114)        | 116 (0.426) | 125 (0.460) | 26 (0.098)  | 129 (0.487) | 110 (0.415) | 0.360  |
| rs1983891  | T/C       | 205 (0.355)     | 180 (0.314) | 0.626 | 36 (0.125)        | 133 (0.460) | 120 (0.415) | 30 (0.105)  | 120 (0.418) | 137 (0.477) | 0.410  |
| rs339331   | T/C       | 399 (0.690)     | 351 (0.620) | 0.643 | 141 (0.488)       | 117 (0.405) | 31 (0.107)  | 107 (0.378) | 137 (0.484) | 39 (0.138)  | 0.690  |
| rs6465657  | C/T       | 506 (0.878)     | 490 (0.863) | 0.410 | 221 (0.767)       | 64 (0.222)  | 3 (0.010)   | 213 (0.750) | 64 (0.225)  | 7 (0.025)   | 0.910  |
| rs1512268  | A/G       | 196 (0.340)     | 179 (0.312) | 0.177 | 28 (0.097)        | 140 (0.486) | 120 (0.417) | 23 (0.080)  | 133 (0.463) | 131 (0.456) | 0.340  |
| rs12543663 | C/A       | 58 (0.101)      | 48 (0.084)  | 0.127 | 6 (0.021)         | 46 (0.160)  | 235 (0.819) | 4 (0.014)   | 40 (0.140)  | 242 (0.846) | 0.110  |
| rs10086908 | T/C       | 412 (0.786)     | 347 (0.803) | 0.558 | 171 (0.653)       | 70 (0.267)  | 21 (0.080)  | 138 (0.639) | 71 (0.329)  | 7 (0.032)   | 0.790  |
| rs1016343  | T/C       | 246 (0.429)     | 218 (0.384) | 0.967 | 63 (0.220)        | 120 (0.418) | 104 (0.362) | 42 (0.148)  | 134 (0.472) | 108 (0.380) | 0.400  |
| rs13252298 | G/A       | 159 (0.285)     | 153 (0.287) | 0.783 | 27 (0.097)        | 105 (0.376) | 147 (0.527) | 21 (0.079)  | 111 (0.416) | 135 (0.506) | 0.330  |
| rs6983561  | C/A       | 167 (0.300)     | 144 (0.254) | 0.680 | 29 (0.104)        | 109 (0.392) | 140 (0.504) | 17 (0.060)  | 110 (0.389) | 156 (0.551) | 0.290  |

Table S3. Cont.

| SNPs ID    | Our Study  |                 |             |       |                   |             |             |             |             |             | Hapmap |
|------------|------------|-----------------|-------------|-------|-------------------|-------------|-------------|-------------|-------------|-------------|--------|
|            | Alleles    | Allele1 (n/RAF) |             |       | Genotype (n/freq) |             |             |             |             |             | RAF    |
|            | (1/2)      | Case            | Control     | HWE   | Case              |             |             | Control     |             |             |        |
|            | 1          | 1               | (p)         | 11    | 12                | 22          | 11          | 12          | 22          |             |        |
| rs16901966 | <b>G/A</b> | 171 (0.299)     | 139 (0.244) | 0.205 | 27 (0.094)        | 117 (0.409) | 142 (0.497) | 13 (0.046)  | 113 (0.396) | 159 (0.558) | 0.290  |
| rs16902094 | <b>G/A</b> | 160 (0.288)     | 152 (0.265) | 0.970 | 22 (0.079)        | 116 (0.417) | 140 (0.504) | 20 (0.070)  | 112 (0.390) | 155 (0.540) | 0.310  |
| rs445114   | <b>T/C</b> | 311 (0.546)     | 309 (0.542) | 0.675 | 87 (0.305)        | 137 (0.481) | 61 (0.214)  | 82 (0.288)  | 145 (0.509) | 58 (0.204)  | 0.510  |
| rs620861   | <b>C/T</b> | 320 (0.559)     | 309 (0.562) | 0.769 | 92 (0.322)        | 136 (0.476) | 58 (0.203)  | 88 (0.320)  | 133 (0.484) | 54 (0.196)  | 0.600  |
| rs6983267  | <b>G/T</b> | 261 (0.463)     | 239 (0.424) | 0.930 | 56 (0.199)        | 149 (0.528) | 77 (0.273)  | 51 (0.181)  | 137 (0.486) | 94 (0.333)  | 0.390  |
| rs1447295  | <b>A/C</b> | 124 (0.224)     | 94 (0.164)  | 0.111 | 8 (0.029)         | 108 (0.390) | 161 (0.581) | 4 (0.014)   | 86 (0.300)  | 197 (0.686) | 0.110  |
| rs11986220 | <b>A/T</b> | 118 (0.211)     | 81 (0.145)  | 0.370 | 5 (0.018)         | 108 (0.387) | 166 (0.595) | 4 (0.014)   | 73 (0.261)  | 203 (0.725) | 0.100  |
| rs10090154 | <b>T/C</b> | 116 (0.208)     | 81 (0.145)  | 0.370 | 5 (0.018)         | 106 (0.380) | 168 (0.602) | 4 (0.014)   | 73 (0.261)  | 203 (0.725) | 0.100  |
| rs7837688  | <b>T/C</b> | 113 (0.203)     | 92 (0.163)  | 0.126 | 5 (0.018)         | 103 (0.369) | 171 (0.613) | 4 (0.014)   | 84 (0.298)  | 194 (0.688) | 0.100  |
| rs10993994 | <b>T/C</b> | 280 (0.522)     | 218 (0.491) | 0.350 | 75 (0.280)        | 130 (0.485) | 63 (0.235)  | 57 (0.257)  | 104 (0.468) | 61 (0.275)  | 0.410  |
| rs7127900  | <b>G/A</b> | 464 (0.847)     | 352 (0.900) | 0.403 | 195 (0.712)       | 74 (0.270)  | 5 (0.018)   | 159 (0.815) | 33 (0.169)  | 3 (0.015)   | 0.870  |
| rs7931342  | <b>G/T</b> | 149 (0.260)     | 162 (0.283) | 0.084 | 27 (0.094)        | 95 (0.332)  | 164 (0.573) | 17 (0.059)  | 128 (0.448) | 141 (0.493) | 0.230  |
| rs9600079  | <b>T/G</b> | 268 (0.464)     | 251 (0.436) | 0.302 | 68 (0.235)        | 132 (0.457) | 89 (0.308)  | 89 (0.308)  | 133 (0.462) | 96 (0.333)  | 0.500  |
| rs4430796  | <b>A/G</b> | 298 (0.764)     | 227 (0.709) | 0.178 | 119 (0.610)       | 60 (0.308)  | 16 (0.082)  | 77 (0.481)  | 73 (0.456)  | 10 (0.062)  | 0.710  |
| rs1859962  | <b>G/T</b> | 242 (0.453)     | 217 (0.409) | 0.384 | 54 (0.202)        | 134 (0.502) | 79 (0.296)  | 41 (0.155)  | 135 (0.509) | 89 (0.336)  | 0.490  |
| rs2735839  | <b>G/A</b> | 330 (0.579)     | 340 (0.607) | 0.191 | 102 (0.358)       | 126 (0.442) | 57 (0.200)  | 98 (0.350)  | 144 (0.514) | 38 (0.136)  | 0.640  |

The risk alleles determined in our study are in bold. 1 and 2 represent the risk and non-risk alleles, respectively. 11, 12 and 22 represent the allele corresponding genotypes. SNP: single nucleotide polymorphism; RAF: risk allele frequency; HWE: Hardy-Weinberg equilibrium.

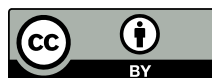

Supplement: ijerph-13-00162-s001.pdf [file ijerph-13-00162-s001.pdf]
